# Supplementary material for: Self-triggered thermoelectric nanoheterojunction for cancer catalytic and immunotherapy
Source: Springer Nature journal article supplement (doi:10.1038/s41467-023-40954-y), 2023-08-23
Supplement: MOESM1 [file 41467_2023_40954_MOESM1_ESM.pdf]

## Supplementary Information

### Self-Triggered Thermoelectric Nano-Heterojunction for Cancer Catalytic and Immuno-Therapy

Xue Yuan<sup>1, †</sup>, Yong Kang<sup>1, †</sup>, Jinrui Dong<sup>1, †</sup>, Ruiyan Li<sup>1</sup>, Jiamin Ye<sup>1</sup>, Yueyue Fan<sup>1</sup>, Jingwen Han<sup>1</sup>, Junhui Yu<sup>1</sup>, Guangjian Ni<sup>1</sup>, Xiaoyuan Ji<sup>1,2\*</sup>, Dong Ming<sup>1</sup>

<sup>1</sup>Academy of Medical Engineering and Translational Medicine, Medical College, Tianjin University, Tianjin 300072, China.

<sup>2</sup> Medical College, Linyi University, Linyi 276000, China

† These authors contributed equally to this work.

\*Corresponding author. Email: jixiaoyuan@tju.edu.cn

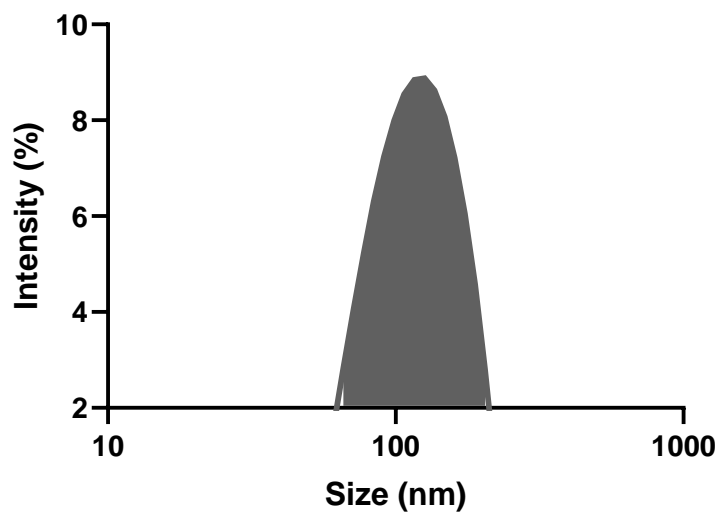

**Supplementary Figure 1.** Size distribution of BST NSs.

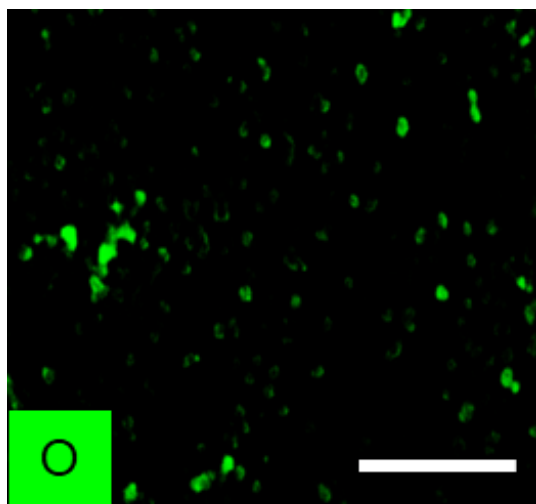

**Supplementary Figure 2.** EDS mapping images of O in CaO<sub>2</sub> NPs. Scale bar = 100 nm. Three times each experiment was repeated independently with similar results.

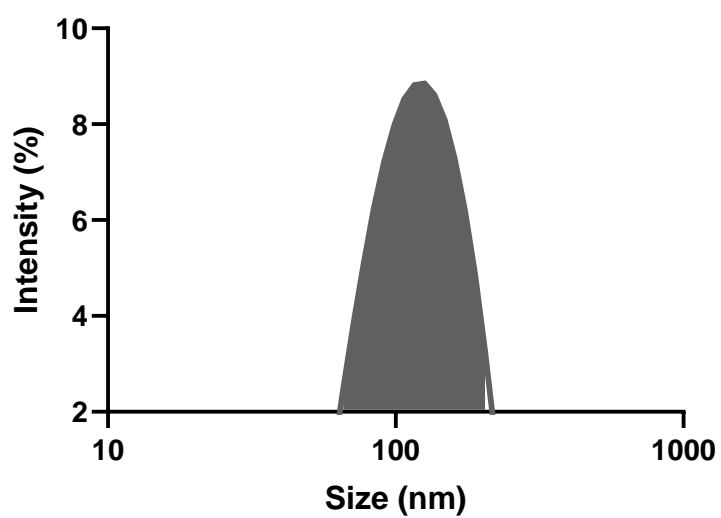

**Supplementary Figure 3.** Size distribution of BST/CaO<sub>2</sub> NSs.

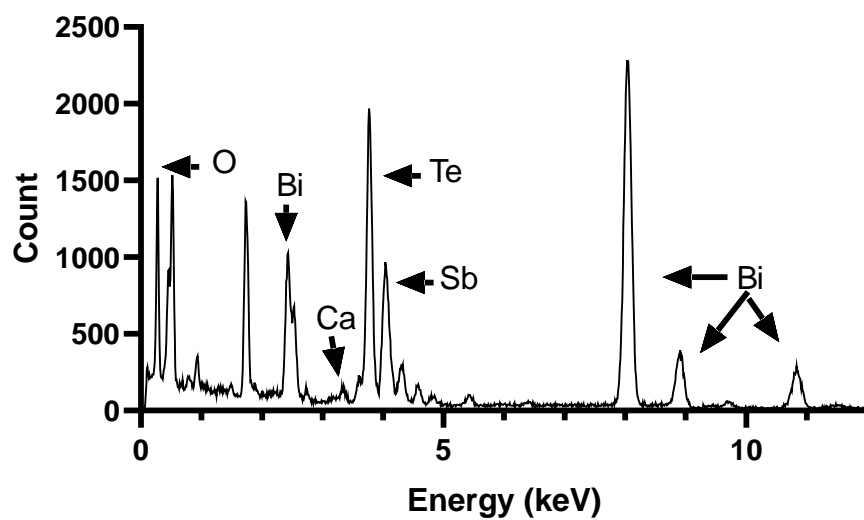

**Supplementary Figure 4.** EDS analysis of BST/CaO<sub>2</sub> NSs.

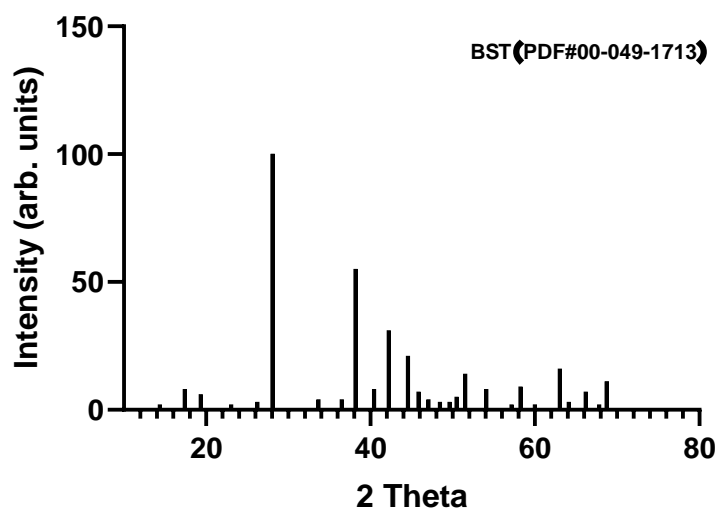

Supplementary Figure 5. Standard XRD card of BST.

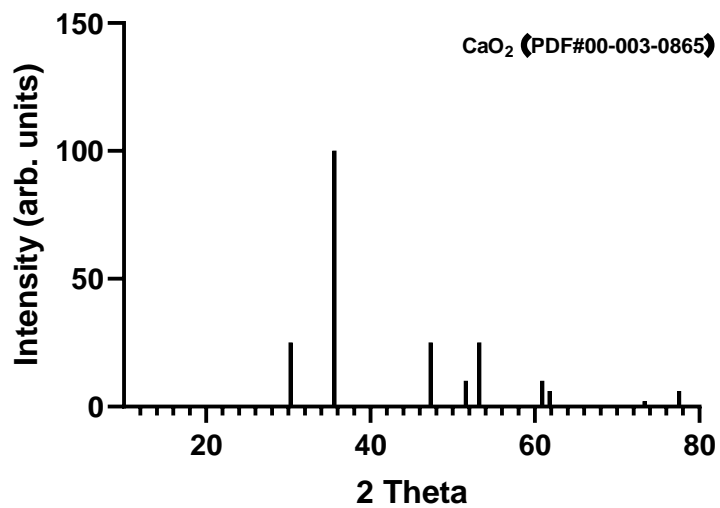

Supplementary Figure 6. Standard XRD card of CaO<sub>2</sub>.

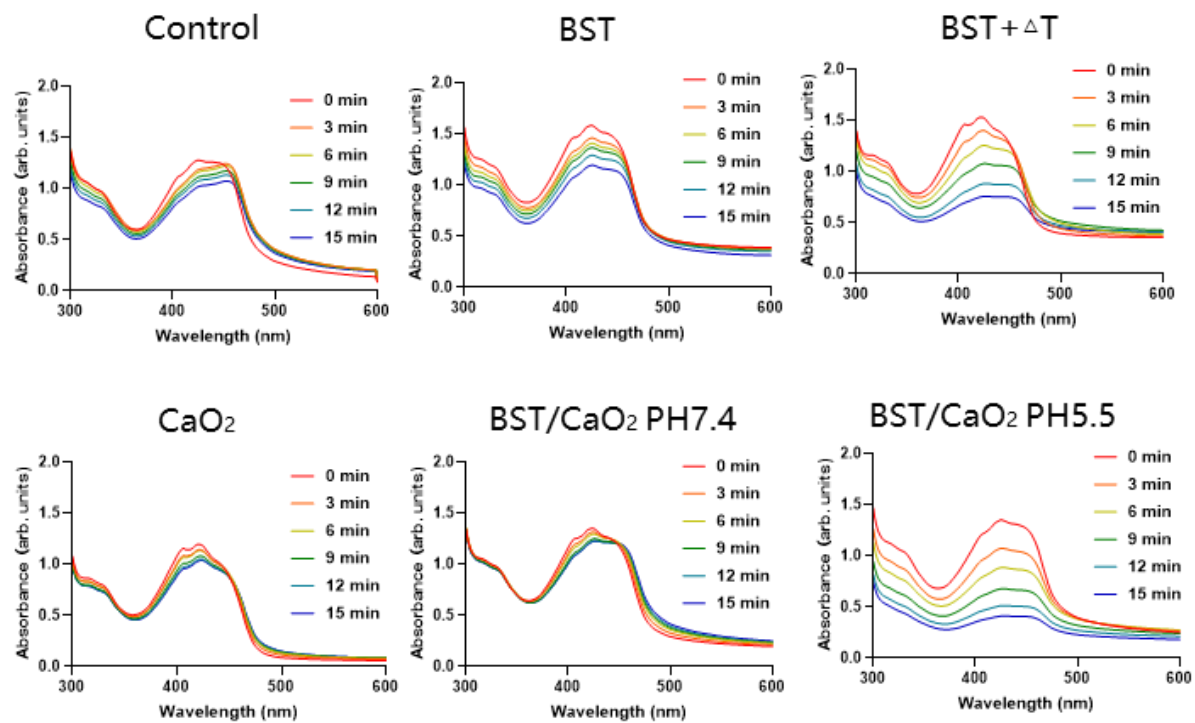

**Supplementary Figure 7.** Degradation of DPBF by different treatments.

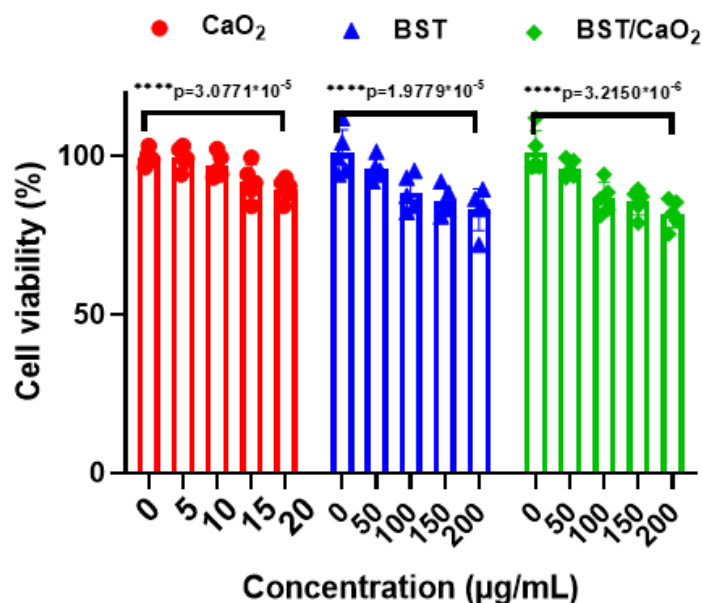

**Supplementary Figure 8.** The cell viability of HEK293 cells under different treatments. Data are presented as the mean  $\pm$  s.d. ( $n = 5$  biologically independent cells). Statistical differences were analyzed by Student's two-sided t test.

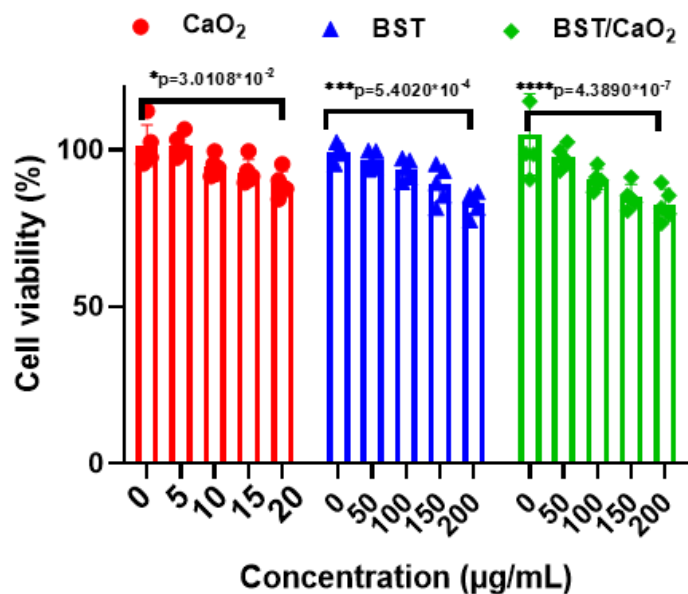

**Supplementary Figure 9.** The cell viability of HL-7702 cells under different treatments. Data are presented as the mean  $\pm$  s.d. ( $n = 5$  biologically independent cells). Statistical differences were analyzed by Student's two-sided t test.

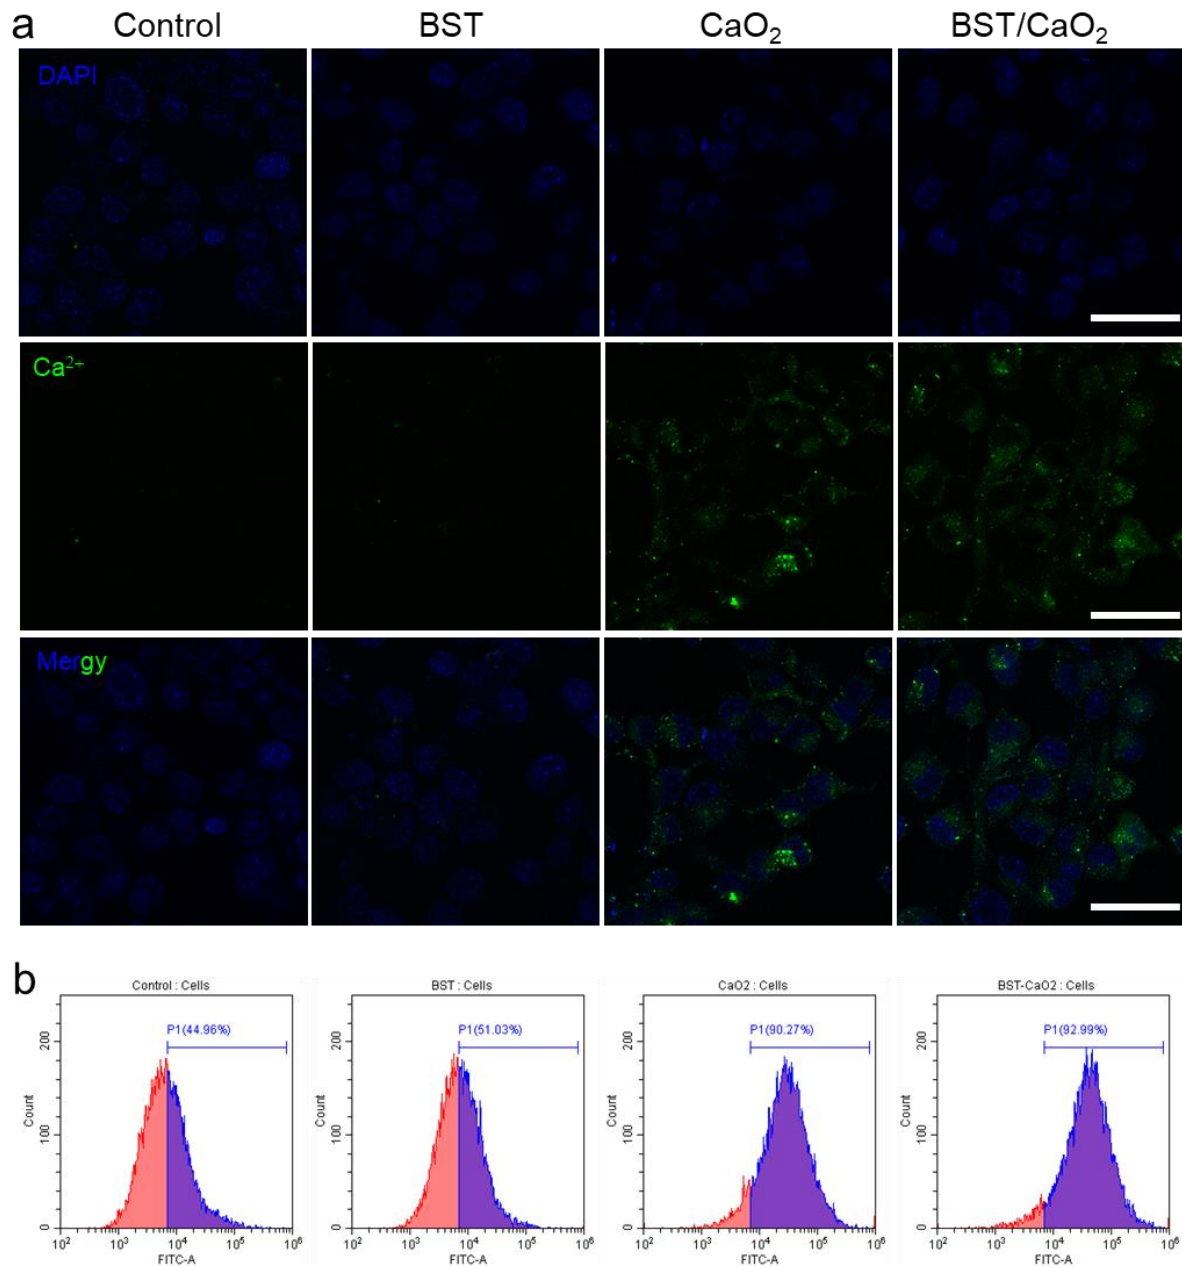

**Supplementary Figure 10.** Analysis of intracellular Ca<sup>2+</sup> concentrations of different treatments. a Confocal laser scanning microscopy (CLSM) images and b flow cytometer (FCM) analysis of intracellular Ca<sup>2+</sup> concentrations of different treatments. Scale bar = 10  $\mu$ m. Three times each experiment was repeated independently with similar results.

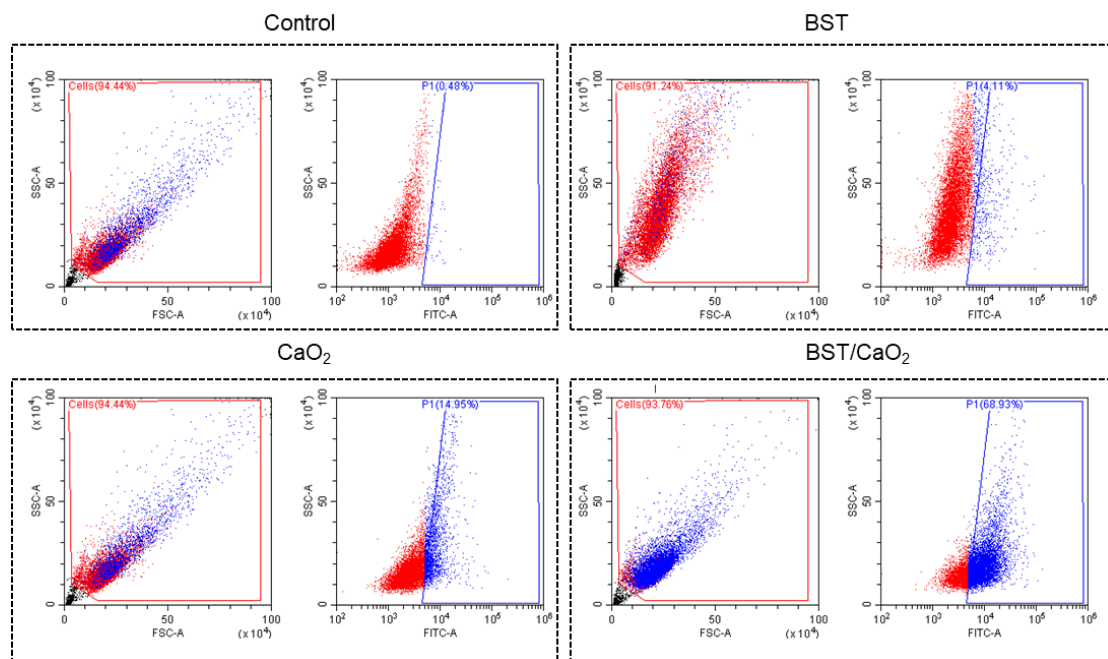

**Supplementary Figure 11.** Intracellular ROS generation in CT26 cells after treatment under different conditions and detection by FCM. These gating panels correspond to FACS data panels in the Fig. 5c.

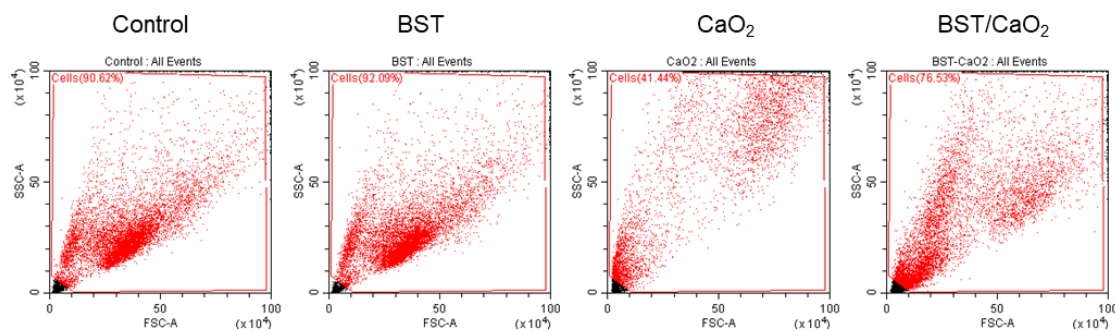

**Supplementary Figure 12.** FCM images of CT26 cells after treatment under different conditions. These gating panels correspond to FACS data panels in the Fig. 5h.



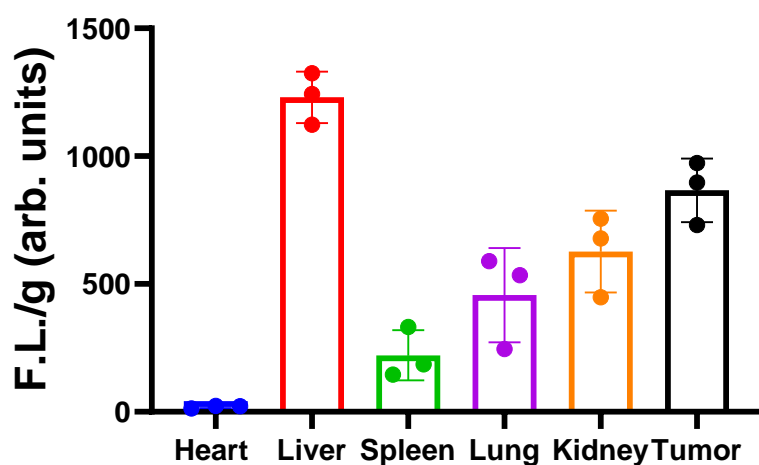

**Supplementary Figure 13.** Semiquantitative analysis of the biodistribution of Cy5.5-labeled BST/CaO<sub>2</sub> NSs in CT26 xenograft tumor-bearing mice. Data are presented as the mean  $\pm$  s.d. (n = 3 biologically independent mice).

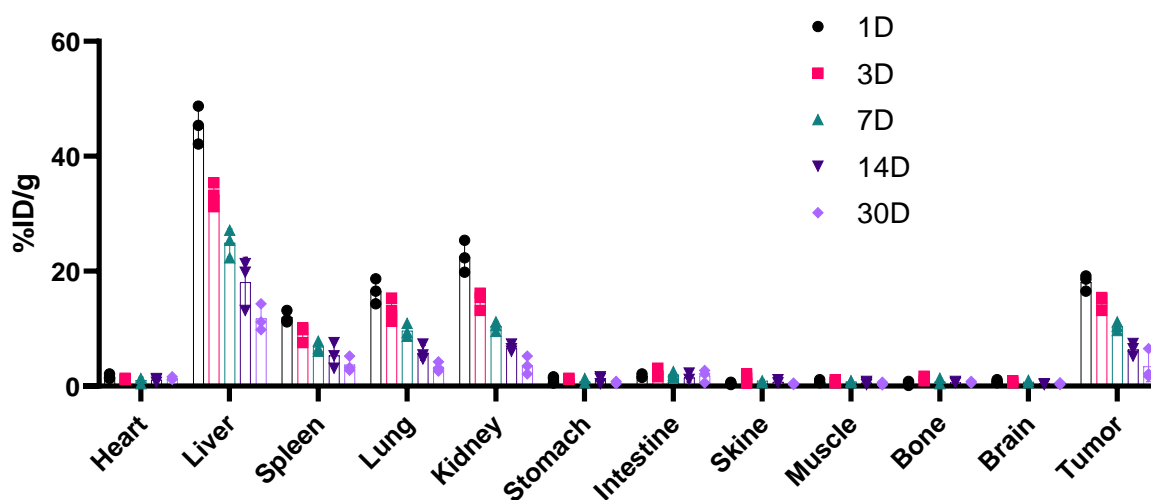

**Supplementary Figure 14.** Biodistribution of BST/CaO<sub>2</sub> NSs at different times. Data are presented as the mean  $\pm$  s.d. (n = 3 biologically independent mice).

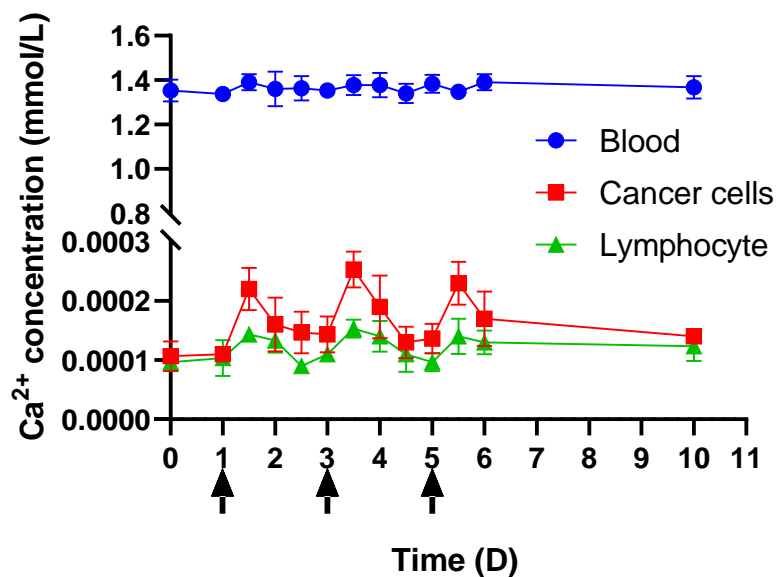

**Supplementary Figure 15.** The concentrations of Ca<sup>2+</sup> in blood, tumor cells, and lymphocytes at different times under treatment with BST/CaO<sub>2</sub> NSs. The black arrow represents the three injection times. Data are presented as the mean  $\pm$  s.d. (n = 3 biologically independent mice).

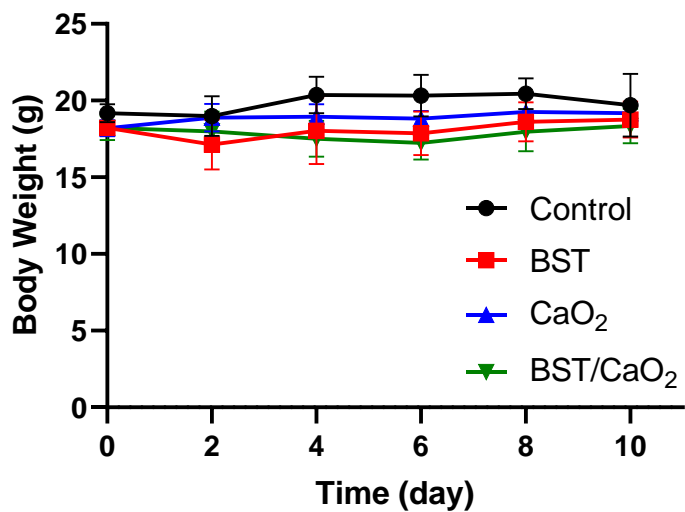

**Supplementary Figure 16.** The weight curves of tumor-bearing mice under different treatments. Data are presented as the mean  $\pm$  s.d. (n = 5 biologically independent mice).

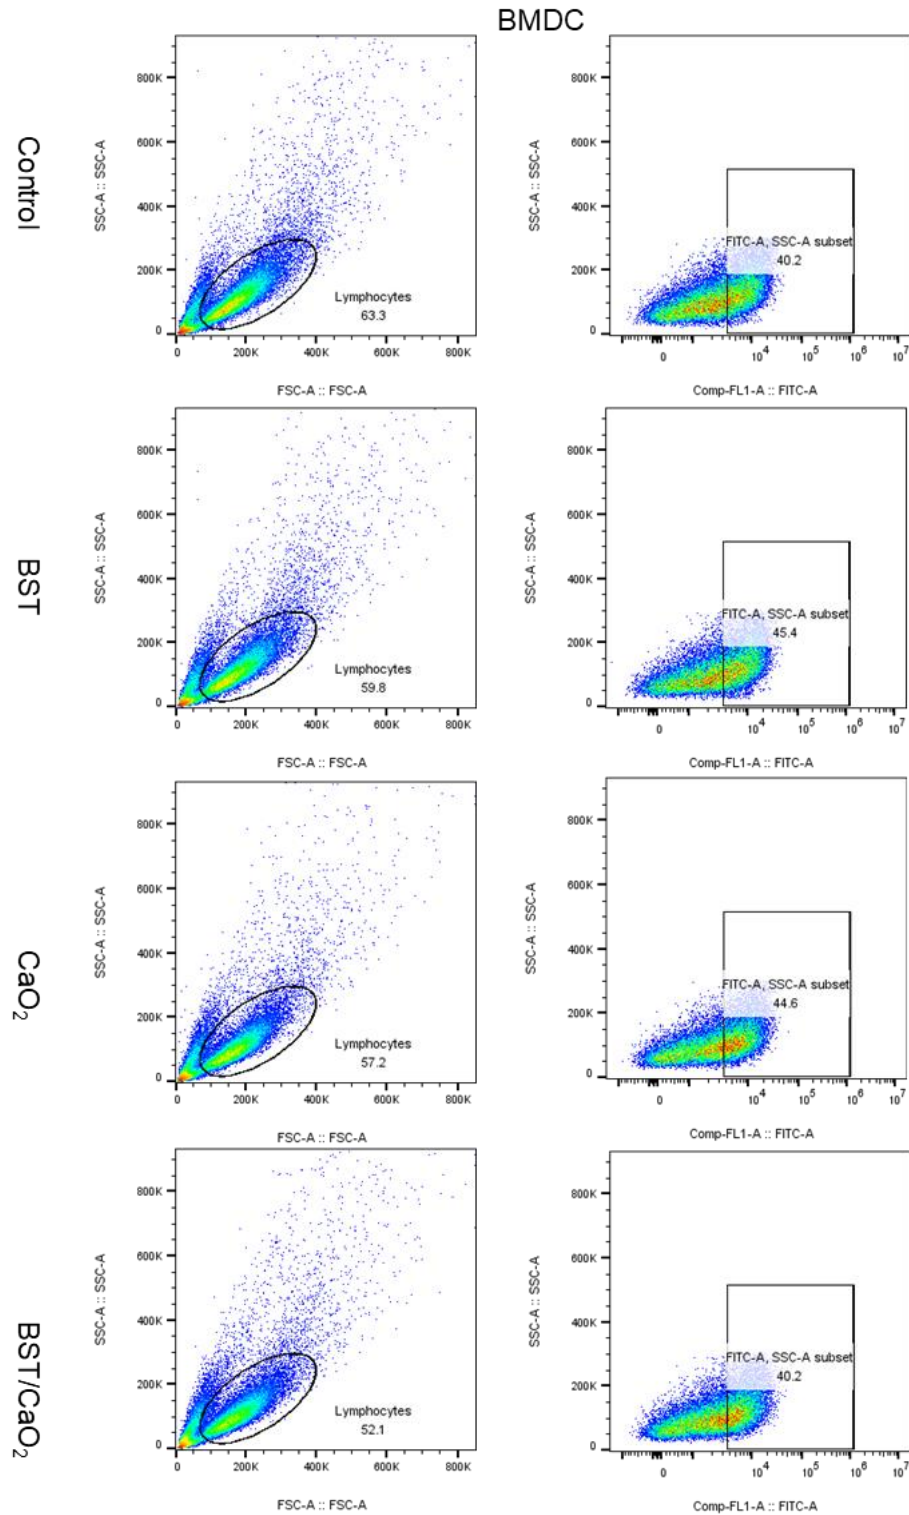

**Supplementary Figure 17.** Flow cytometry analysis of the percentage of mature DCs (CD11c<sup>+</sup> CD80<sup>+</sup> CD86<sup>+</sup>) induced by different treatments. These gating panels correspond to FACS data panels in the Fig. 7g.

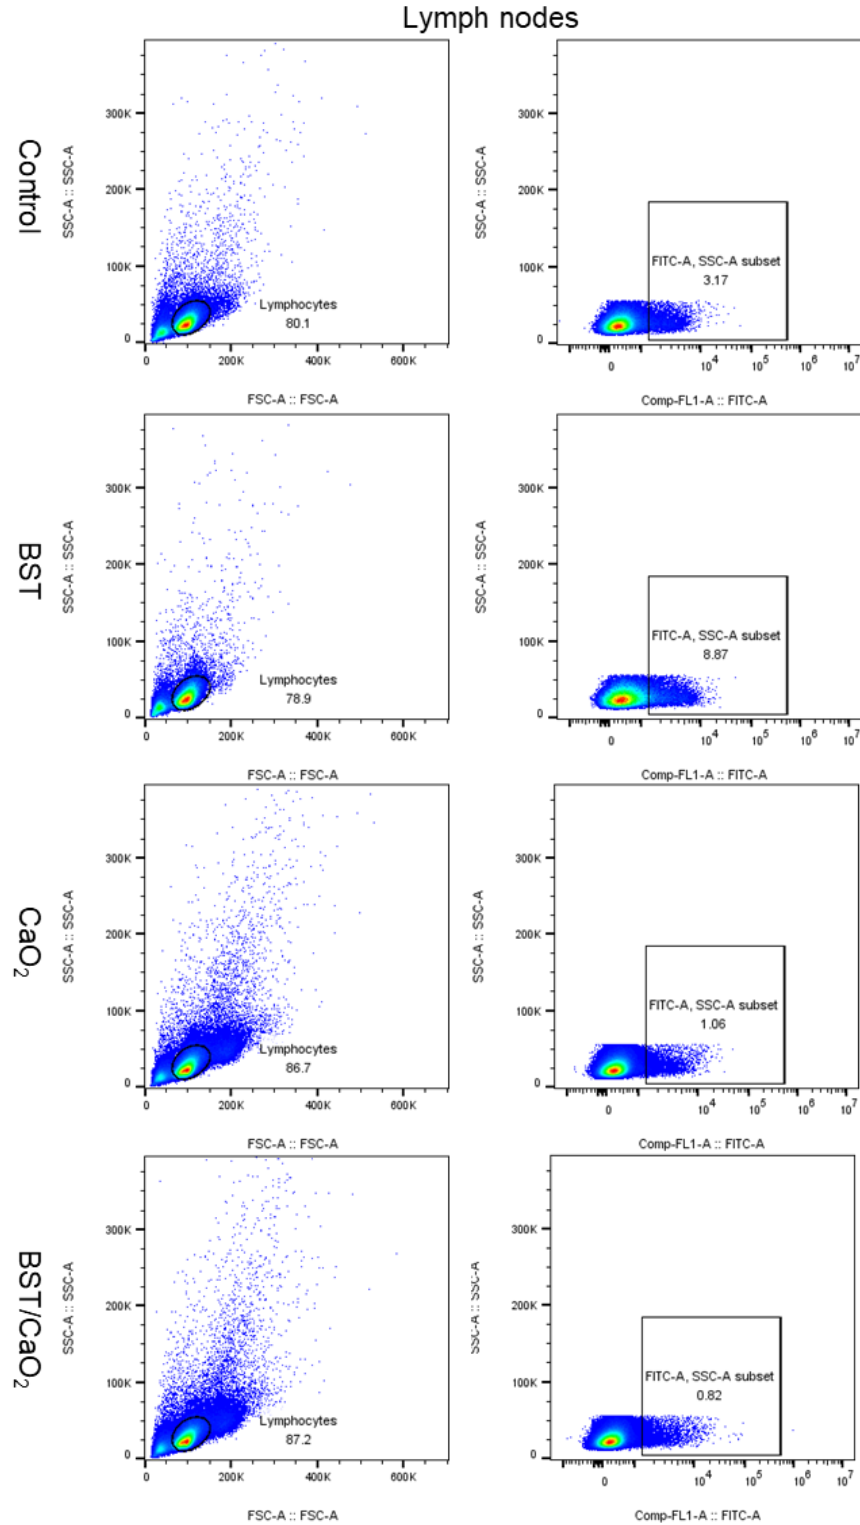

**Supplementary Figure 18.** Flow cytometry analysis of the percentage of mature DCs in lymph nodes (CD11c<sup>+</sup> CD80<sup>+</sup> CD86<sup>+</sup>) induced by different treatments. These gating panels correspond to FACS data panels in the Fig. 7h.

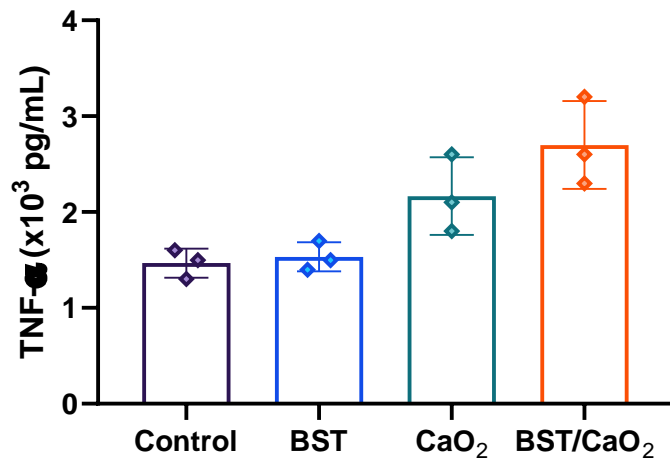

**Supplementary Figure 19.** Serum levels of TNF- $\alpha$  in tumor-bearing mice under different treatments. Data are presented as the mean  $\pm$  s.d. (n = 3 biologically independent mice).

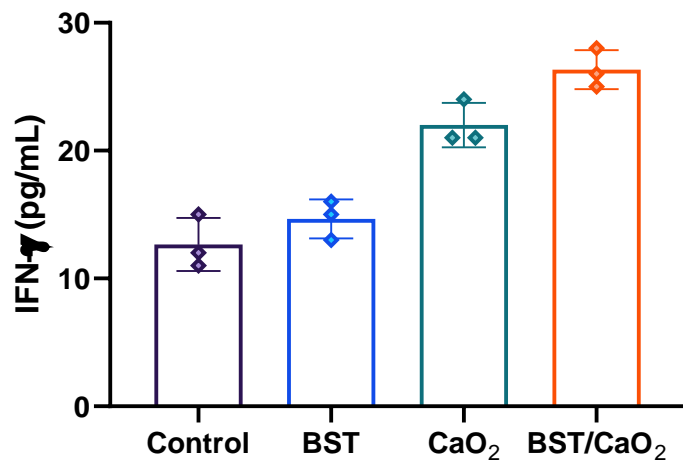

**Supplementary Figure 20.** Serum levels of IFN- $\gamma$  in tumor-bearing mice under different treatments. Data are presented as the mean  $\pm$  s.d. (n = 3 biologically independent mice).

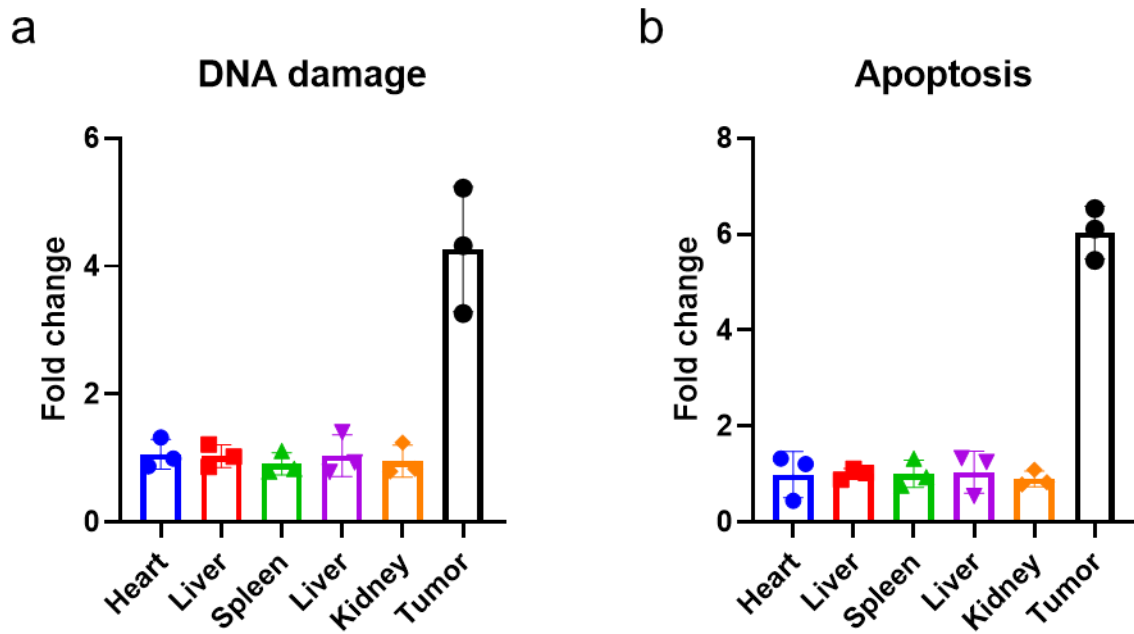

**Supplementary Figure 21.** Quantitatively measure the apoptosis and DNA damage of organs and tumors after treatment with BST/CaO<sub>2</sub>. Data are presented as the mean  $\pm$  s.d. (n = 3 biologically independent mice).

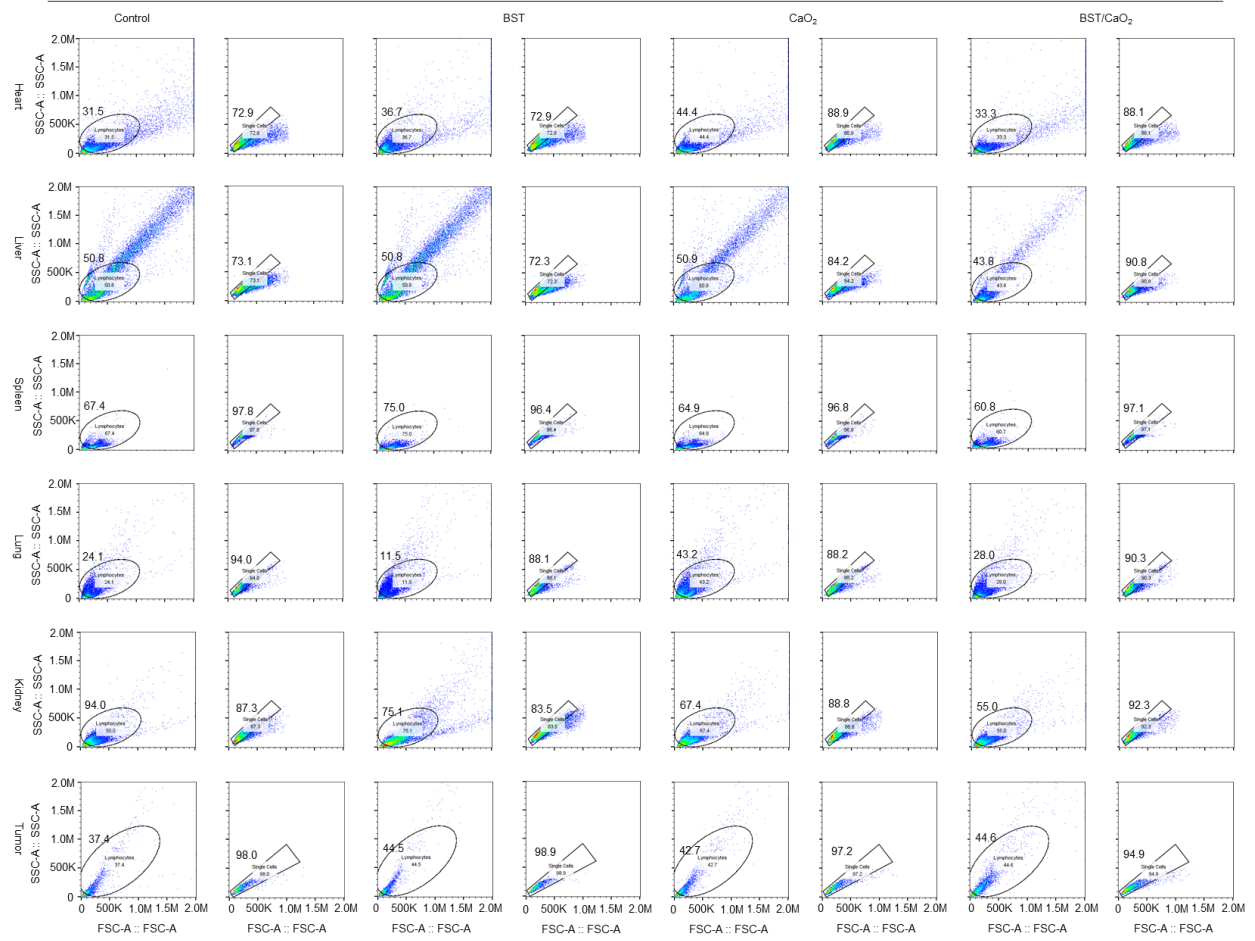

**Supplementary Figure 22.** Flow cytometry analysis of apoptosis in major organs and tumors induced by different treatments. These gating panels correspond to FACS data panels in the Fig. 9.

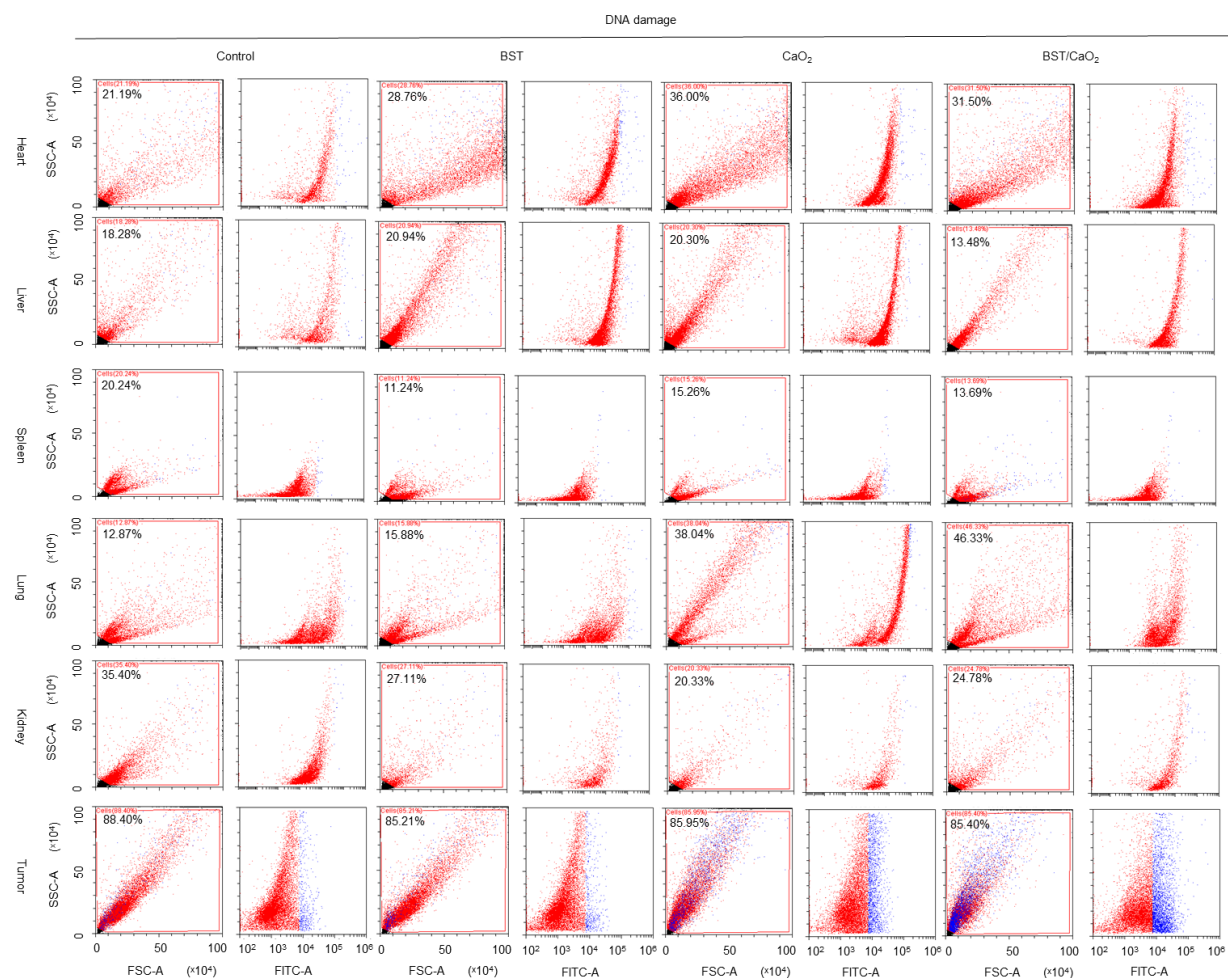

**Supplementary Figure 23.** Flow cytometry analysis of DNA damage in major organs and tumors induced by different treatments. These gating panels correspond to FACS data panels in the Fig. 9.



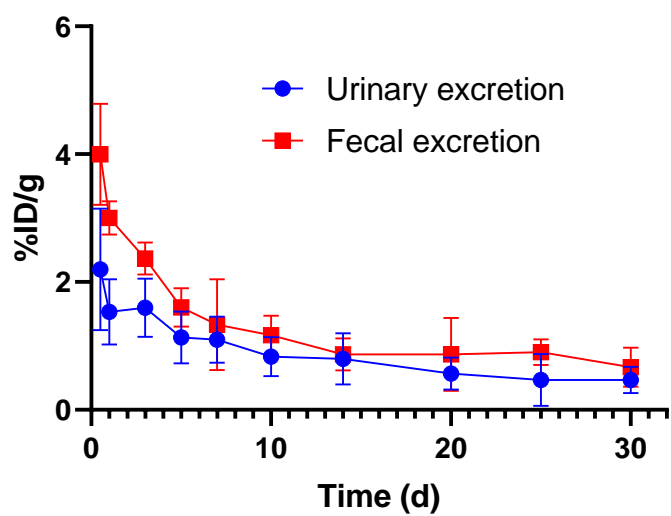

**Supplementary Figure 24.** Urinary excretion and fecal excretion of BST/CaO<sub>2</sub> NSs at different time points. Data are presented as the mean  $\pm$  s.d. ( $n = 3$  biologically independent mice).
